# Supplementary material
Source: PubMed Central journal article supplement (PMC9830645)
Supplement: NIHMS1848740-supplement-supplemental_file.pdf [file NIHMS1848740-supplement-supplemental_file.pdf]

1 Supplemental

A

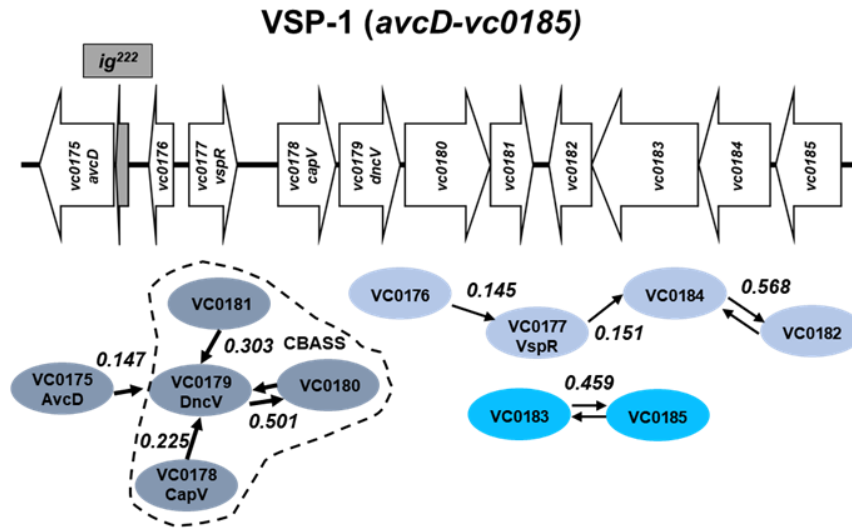

B

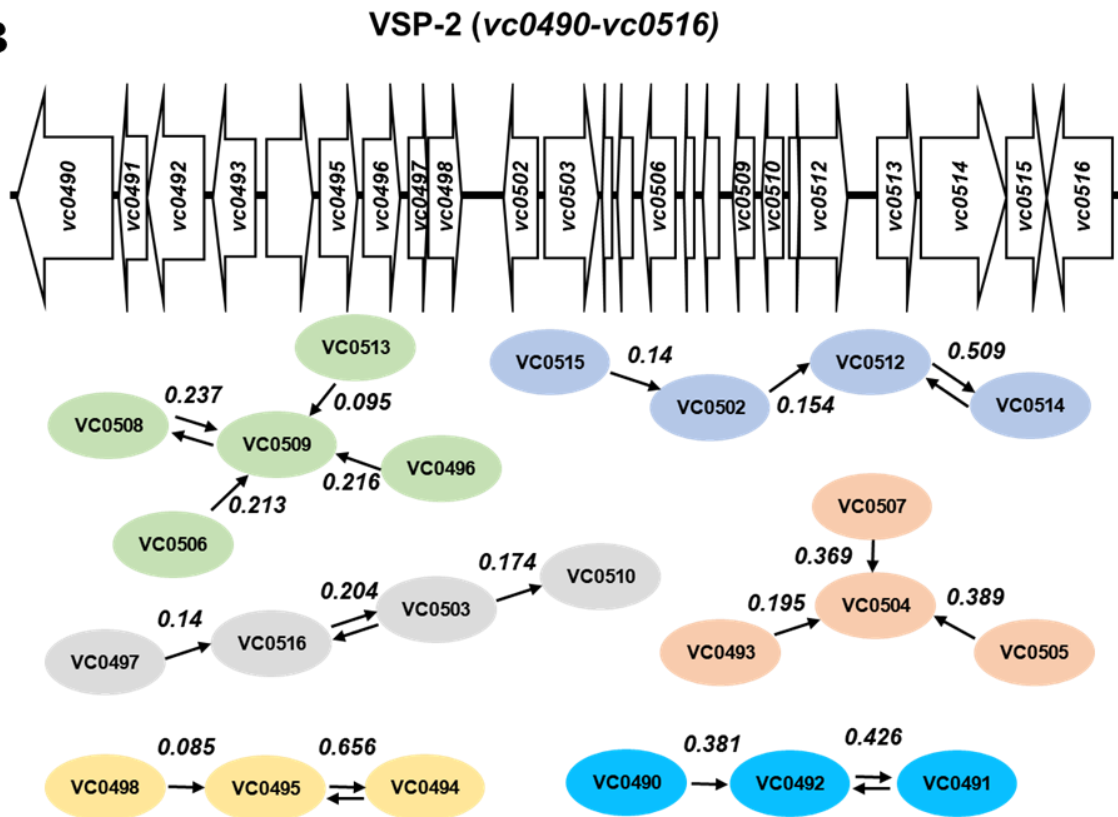

2  
3  
4  
5  
6  
7  
8  
9

**Supplemental Figure 1. VSP-1 and VSP-2 schematic and predicted gene networks (MRS).** Cartoon of VSP-1 (A) and VSP-2 (B) from El Tor *V. cholerae* N16961 and gene network predictions from Correligy. Arrows indicate the highest partial correlation  $W_{ij}$  each gene has to another (ovals). Two arrows are presented pointing in opposing directions where the highest correlation  $W_{ij}$  is reciprocal between two genes. MRS = maximum relatedness subnetwork

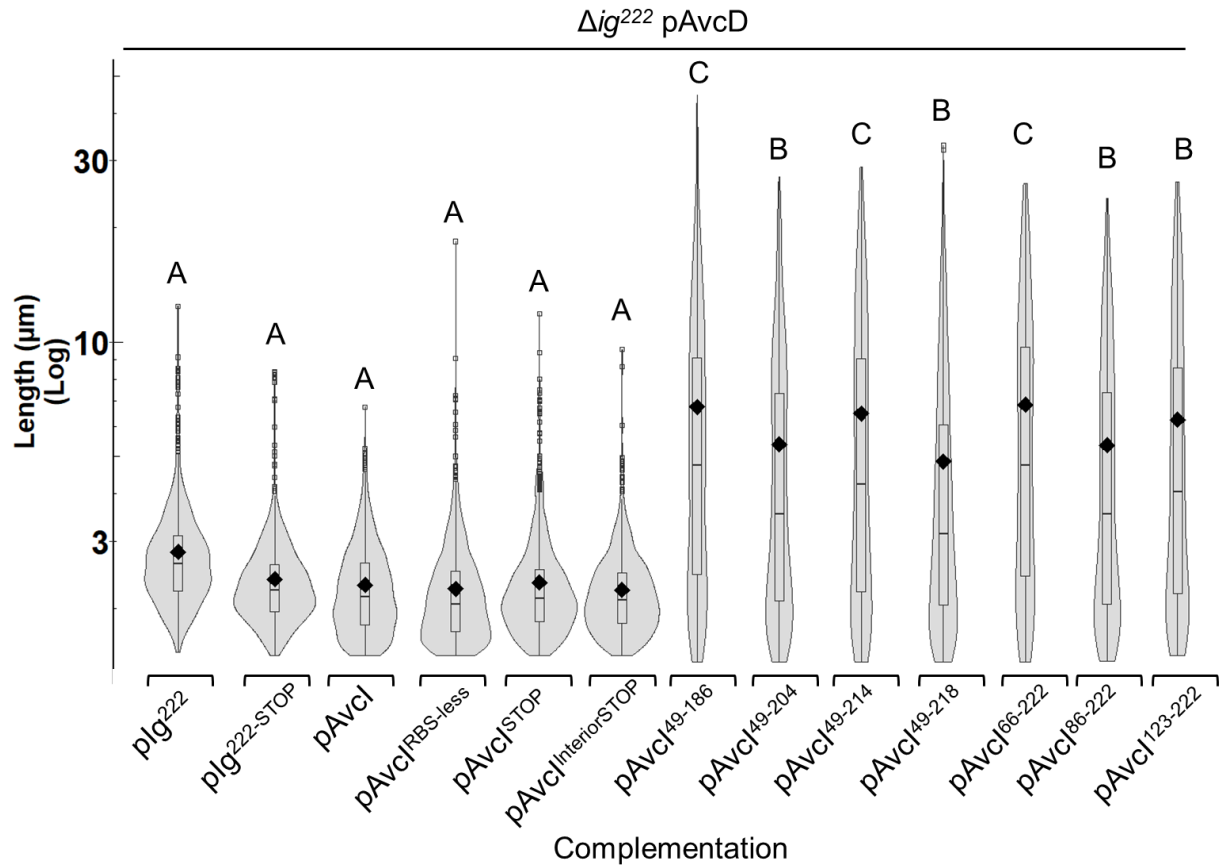

10  
11  
12  
13  
14  
15  
16  
17  
18

**Supplemental Figure 2. Complementation of various  $ig^{222}$  constructs to prevent AvcD induced cell filamentation.**

Cell length distributions of  $\Delta ig^{222}$  *V. cholerae* expressing pAvcD. All cell length distributions represent ~750-1000 cells measured per strain with summary statistics: mean (diamonds), median (horizontal black line), interquartile range (box), and data below and above the interquartile range (vertical lines). Different letters indicate significant differences at  $p < 0.05$ , according to Tukey's post-hoc test.

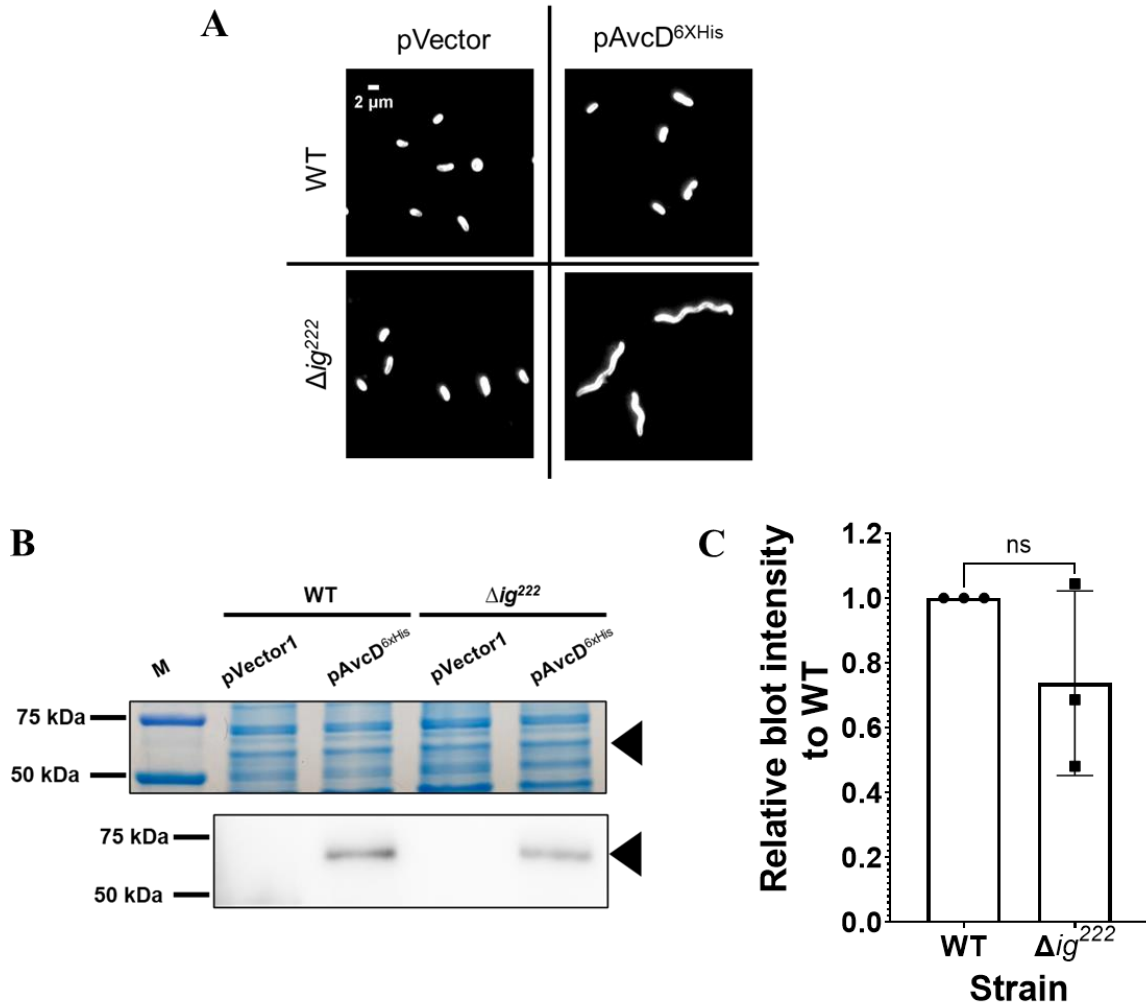

19  
 20 **Supplemental Figure 3. AvcD C-terminal 6x Histidine fusion maintains the same activity as**  
 21 **the WT AvcD enzyme and the presence of *avcI* does not reduce the abundance of AvcD.**  
 22 **(A)** Representative images of WT *V. cholerae* and  $\Delta ig^{222}$  cultures maintaining an empty vector  
 23 plasmid (pVector1) or  $P_{tac}$ -inducible *avcD-6xHIS* plasmid (pAvcD<sup>6xHis</sup>) grown in the presence of  
 24 100  $\mu$ M IPTG for 2 h. Cells were stained with FM4-64 prior to imaging and performed in biological  
 25 triplicate. **(B)** Representative coomassie stained PAGE gel (top) and matched anti-6x His antibody  
 26 Western blot (bottom) of whole cell lysates normalized to total protein from *V. cholerae* WT and  
 27  $\Delta ig^{222}$  cultures maintaining pVector1 or pAvcD<sup>6xHis</sup>. Black triangles correspond to AvcD<sup>6xHis</sup> (60.6  
 28 kDa). Analysis was performed in biological triplicate and the relative signal intensity **(C.)** was the  
 29 determined by comparing the intensities of AvcD<sup>6xHIS</sup> from paired WT and  $\Delta ig^{222}$  lysates probed  
 30 on the same blots.

31  
 32  
 33  
 34  
 35  
 36

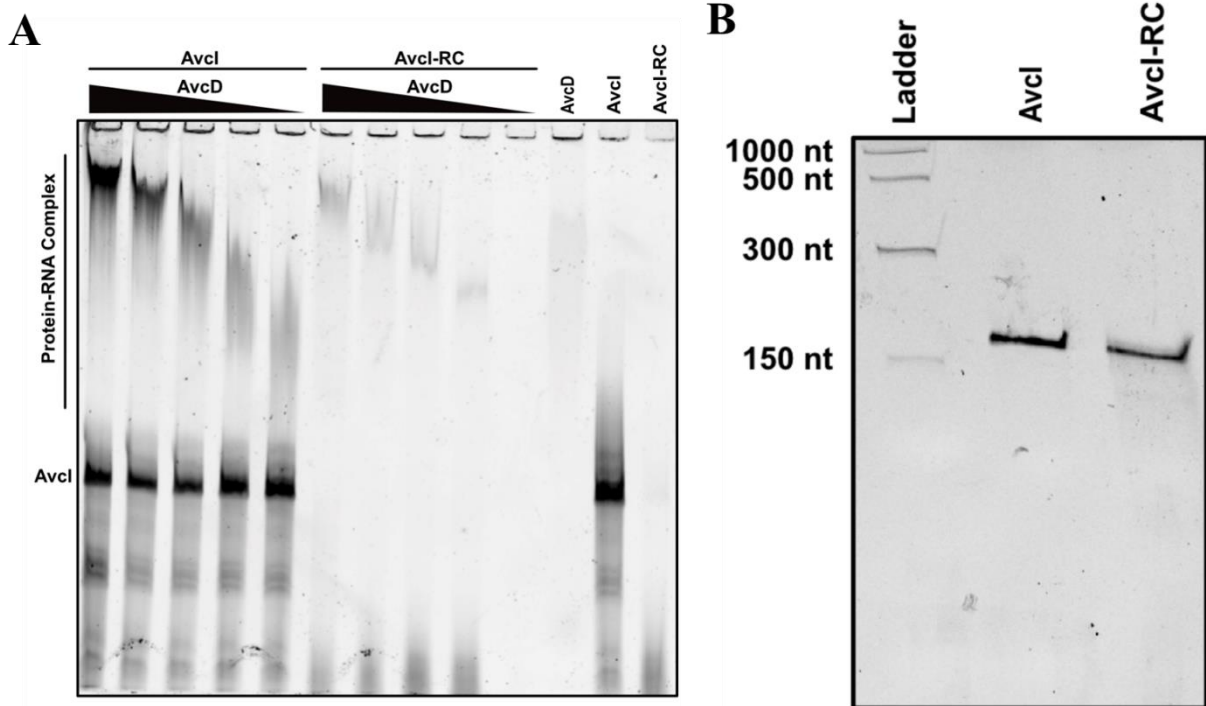

37  
 38 **Supplemental Figure 4. AvcD-AvcI complex formation in solution and Denaturing urea**  
 39 **PAGE analysis of Avcl and Avcl-RC.**  
 40 (A) AvcD forms a complex with Avcl in an AvcD concentration-dependent manner as determined  
 41 by EMSA. Trace quantities of Avcl reverse complement (Avcl-RC) binding to AvcD in a non-  
 42 specific manner is observed. (B) Avcl and Avcl-RC run at essentially equivalent molecular weights  
 43 on a 7 M urea denaturing PAGE. Low range ssRNA ladder (NEB).  
 44  
 45  
 46  
 47  
 48  
 49

|                     |                                                                                                                                                                               |     |
|---------------------|-------------------------------------------------------------------------------------------------------------------------------------------------------------------------------|-----|
| V. cholerae         | MFTMKSSAKKILSTVPS--PTKSNSSSSNDLQKRILERRSRELVIGLCGAIGSGVKALKESLVSSLETYGVEVDIRISKIIESEKTQ--T--SLDGLSAFKRYNRLQDLGNSLRETHK                                                        | 113 |
| V. parahaemolyticus | ---MGKSSTATKLPQLQ--SVSTSSSTEDIQKRIEQERRSQELIIGLCGAIGSGVKALKDNLIHSLSSGYQVQHIRISNIIAEKTN--I--VIDNIIHAERYITLQDKGDELRESEK                                                         | 110 |
| P. mirabilis        | ---MGNPAKVITITNNLS--DVNFDSDFDKVESKIKERHSNLIILALCGTAVSGVRKLESLIEQFENFNKVKHIRISDLIAEQNESPO--KIKNLSGYSRYEKLQDLGDELREKNT                                                          | 112 |
| E. coli             | ---MA----IALKKEVQKKGSLSDNSNSPEMQTIIITRQSPDLFVIGLCPGAGCGKTKVNSLVKVAKSNHYDVVHRIISDLMDPLDLYFEKKVIEENDVLNKERHIRMKQLANGLRHRYK                                                      | 112 |
|                     | * . . . . . * . . . . . * . . . . . * . . . . . * . . . . . * . . . . . * . . . . . * . . . . . * . . . . . * . . . . . * . . . . . * . . . . .                               |     |
| V. cholerae         | SS-ILAACAIEIALERTLICQNEIDETSEENDNEPSLIKTKKIAVYIDQLKHPDEIKF LRSVYPRNFYL IGLIRTEGERRLNLEEEKISPSEITL MRRDRKD-VSHGQQVEKSLFHA                                                      | 231 |
| V. parahaemolyticus | TS-ILAACAIIEI AVARTIFCQDEIEE-----DDQASVITTKKIAYVLDQLKHPDEVKLLRSVYPRNFYLLGLIRTEKERRLNLEEEKMSLQEI DELIRDRKG-VDHGQQVEKTLHNA                                                      | 223 |
| P. mirabilis        | NN-ICAQLAIRRIINWRHRTYGT ELKE-----NESP KHTKLTDKVYIIDQLKHPAEVGLFRTVYKNNFYLLGLLRNVNERERNLRADGLDSEIKLLINRDRKNSASYGQVEDTLQLS                                                       | 226 |
| E. coli             | KKELLAEAAITYIKSOK-----VKK-----EOKSVKTKTIVYIIDQLKRP EIEELRIIYQHHFYLLIGIVRDP EHTVRNLKEDDSSL EDIYHIINVDKSDODFGQRTSKAILDS                                                         | 216 |
|                     | .. : * * * * * : : : : . . . . . * . . . . . * . . . . . * . . . . . * . . . . . * . . . . . * . . . . . * . . . . . * . . . . . * . . . . .                                  |     |
| V. cholerae         | DYFIHNHNQKQHLKDSVERFIKLVHGINGISPTIDEIGMHAAYSAAALRSACL SRQVGAAILDNQGNIIITGCNDVPSFGGGLYNSNS-LADFRCV-HTGRCSNDKHKDILKEEITDILK                                                     | 349 |
| V. parahaemolyticus | DYFIHNHNHNSQLLEKSVDRFIKLVHGVNITPTIDEIGMHAASHASLRSACL SRQVGAAITDEHGGVISTGCNDVPSFNGGLYNSNS-STD FRCV-HRGCQNDKHKALLKEEIRDILS                                                      | 341 |
| P. mirabilis        | DYFI RNIEQLS-EINKSVNRFISL I HGVHITPTKDEIGMFTAYHSSLRACL SRQVGACIVDDEGNLSTGCNDVPKFKGGLYNAES-VSDNRCH-NVGRCSNDLHKSMLRKHQI IDILQ                                                   | 343 |
| E. coli             | DVFIKNNQSQKNNLEKKINRFGLIHGQGLTP IA EKG MYSAYAASLQSACL SRQVGAALLDDEGNL LAVGKNDVPKSGGGLYISDDGDNDRHC VYKSGKYNIA TKLKIKKR IADILI                                                  | 336 |
|                     | * * * * * . . . . . * * * * * : * * * * * : * * * * * : * * * * * : * * * * * : * * * * * : * * * * * : * * * * * : * * * * * : * * * * * : * * * * * : * * * * * : * * * * * |     |
| V. cholerae         | KSITNTLE-----LKEIVNQITSEKIKTLIEYSRAVHAEMDSLIALARN NKETSVDKTL YVTTYPCHNCARHIVAAGIKKVVVYEPYKSLAMKLHDDSIDNADA-KN                                                                 | 453 |
| V. parahaemolyticus | KELNNEVL-----LNTLTKITSGTKIKSLIEYSRAVHAEMDAIVALARN NKESAVGKTL FATTYPCHNCARHIVAAGIKRVVYIEPYKSLAMKLHDDSIDTDSGE--SE                                                               | 444 |
| P. mirabilis        | DESIDD-----AENLASKIMNNTKAKYII EYSRAIHAEMDAISMLARN TSVGTVDKIMHYCTTYPCHNCARHIVAAGIKKVVVYIEPYKSLARLDHDAICHDDMSSE                                                                 | 446 |
| E. coli             | DELKNNIGSDSNLDFLFKKISNNIADIADVYSKISSVM EYSRSIHAEMDVIITMARK SSEGKGTLYTTTYPCHNCARHIVSSGMKVIYIEPFOKSLALDLHDDAITTTED--PS                                                          | 454 |
|                     | .. : . . . . . * . . . . . * . . . . . * . . . . . * . . . . . * . . . . . * . . . . . * . . . . . * . . . . . * . . . . . * . . . . . * . . . . .                            |     |
| V. cholerae         | KVCLFPFEGVSSRRYEVFFQMHGDRKDDKTGKVLNINIQDSYHADSEFLDNYAEMAKIAQSVNALLNVPSS EEESTQD                                                                                               | 532 |
| V. parahaemolyticus | KVKLSPFEGVSPRRFEAFFRSNGNRKDD-DGRVIKIKVHDSYHADSEFIDNYP EMEAKVAQSVSDFTKQV EATI-E-                                                                                               | 520 |
| P. mirabilis        | KVLFANFEGVSPHRYSSFFKYHSARKDK-DGRVLNQKVITAKQVPTGLDSYFYDEAKTVQDVLNRLGEERS-----                                                                                                  | 517 |
| E. coli             | RVIFSKFEGVAPRRYKFFMP TDERKDEV TGEAYS FNVKYKRHIDVQFLDSYRTYEDIVAQRFLKDVAKVEPKQDDL I-                                                                                            | 532 |
|                     | : * : * * * : * . * * . * . . . . . : * : * * * * * * * * * : * : * * * * * * * * * : * : * * * * * * * * * : * : * * * * * * * * * : * : * * * * * * * * *                   |     |

50  
51  
52  
53  
54  
55  
56  
57  
58  
59  
60  
61  
62  
63  
64  
65  
66  
67  
68  
69  
70  
71  
72  
73  
74  
75  
76  
77  
78  
79  
80  
81  
82  
83  
84  
85

**Supplemental Figure 5. ClustalW multiple sequence alignment of Avcd homologs show conservation of likely active site residues explored in this study.**

Amino acid alignment of the *V. cholerae* Avcd and three homologs using EMBL-EBI ClustalW<sup>42</sup>. “\*” indicates 100% identity, “:” indicates >75%, and “.” Indicates >50% similarity. Black triangles indicate conserved residues in *V. cholerae* Avcd targeted for site-directed mutagenesis.

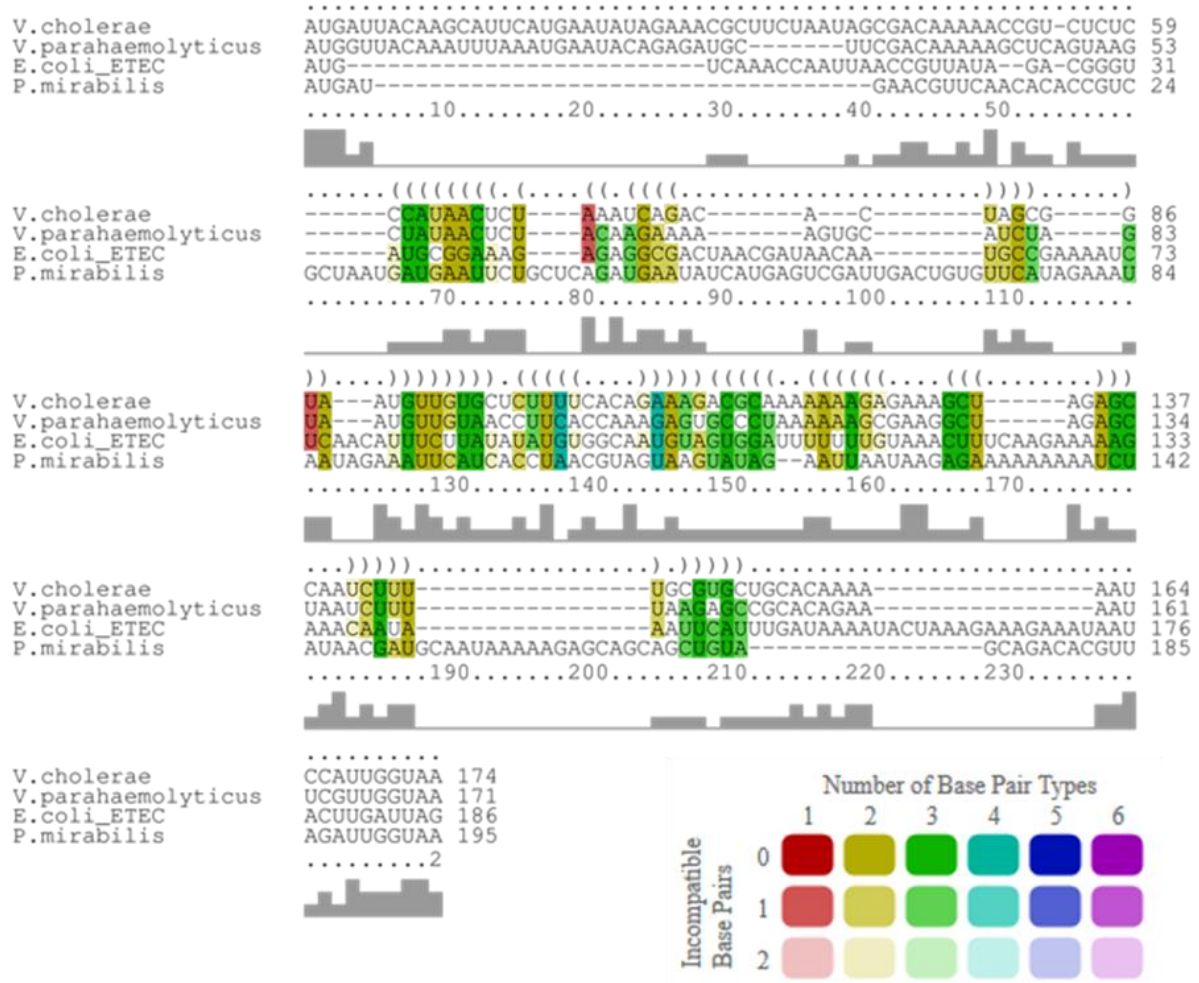

86

87 **Supplemental Figure 6. Nucleotide multiple sequence alignment of Avcl and homologs.**  
 88 Nucleotide alignment of *V. cholerae* Avcl and three homologs using LocARNA<sup>43</sup>. The average  
 89 secondary structure is indicated in dot-bracket notation (top). Consensus identities are correlated  
 90 with the height of the bars below the corresponding nucleotide. Compatible base pairs are colored  
 91 according to the number of different types C-G (1), G-C (2), A-U (3), U-A (4), G-U (5) or U-G (6)  
 92 of compatible base pairs in the corresponding columns. The color saturation decreases with the  
 93 number of incompatible base pairs.

94

95

96

97

98

99

100

101

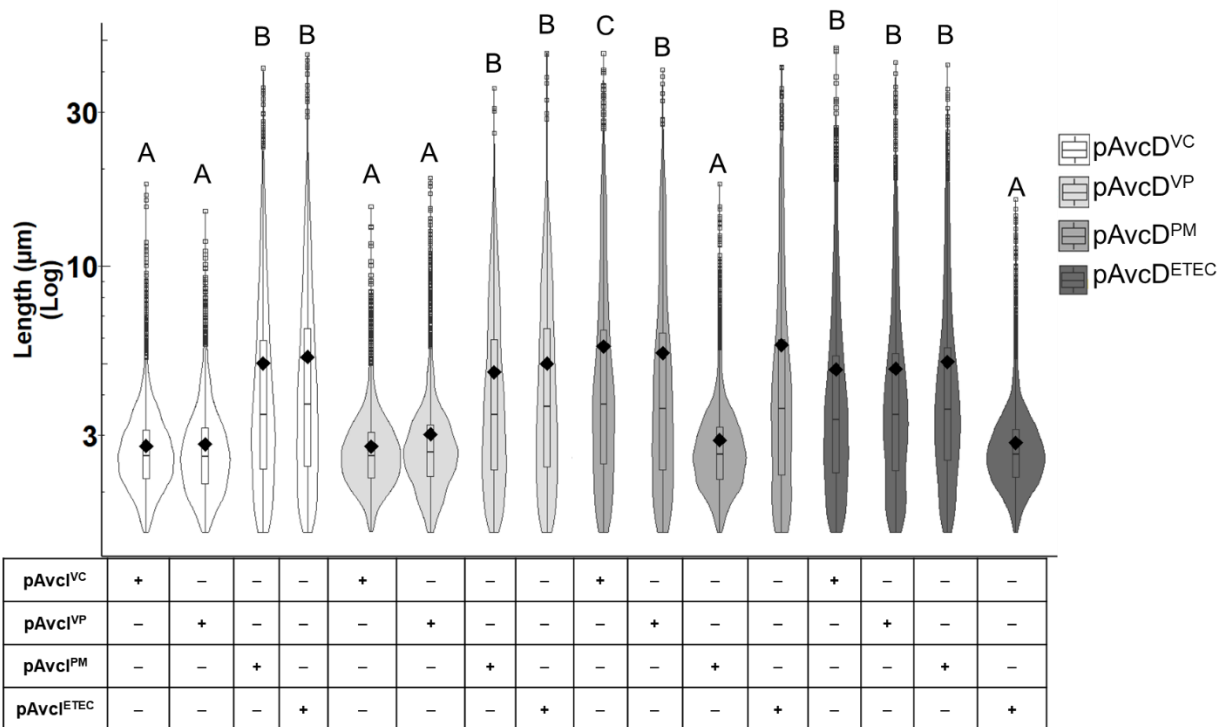

102  
103  
104  
105  
106  
107  
108  
109  
110

**Supplemental Figure 7. Cross-species inhibition of *avcD* and *avcI* homologs.**

Cell length distributions of *E. coli* co-expressing various combinations of P<sub>tac</sub>-inducible plasmids encoding homologs of *avcD* and *avcI*. All cell length distributions represent ~1000-3000 cells measured per strain with summary statistics: mean (diamonds), median (horizontal black line), interquartile range (box), and data below and above the interquartile range (vertical lines). Different letters indicate significant differences at  $p < 0.05$ , according to Tukey's post-hoc test. VC = *Vibrio cholerae*, VP = *Vibrio parahaemolyticus*, PM = *Proteus mirabilis*, ETEC = *E. coli* ETEC .



**A**

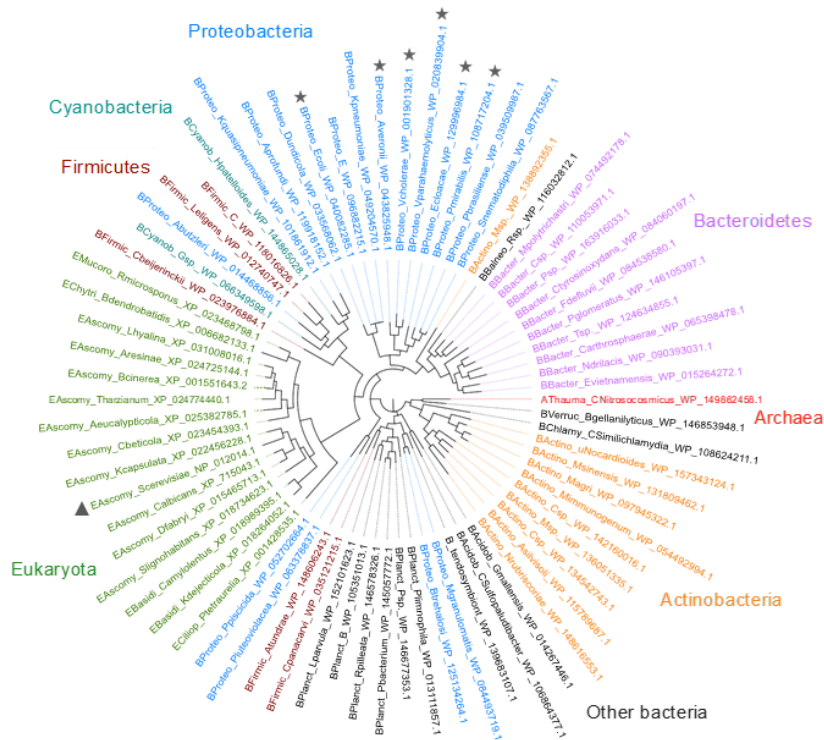

**B**

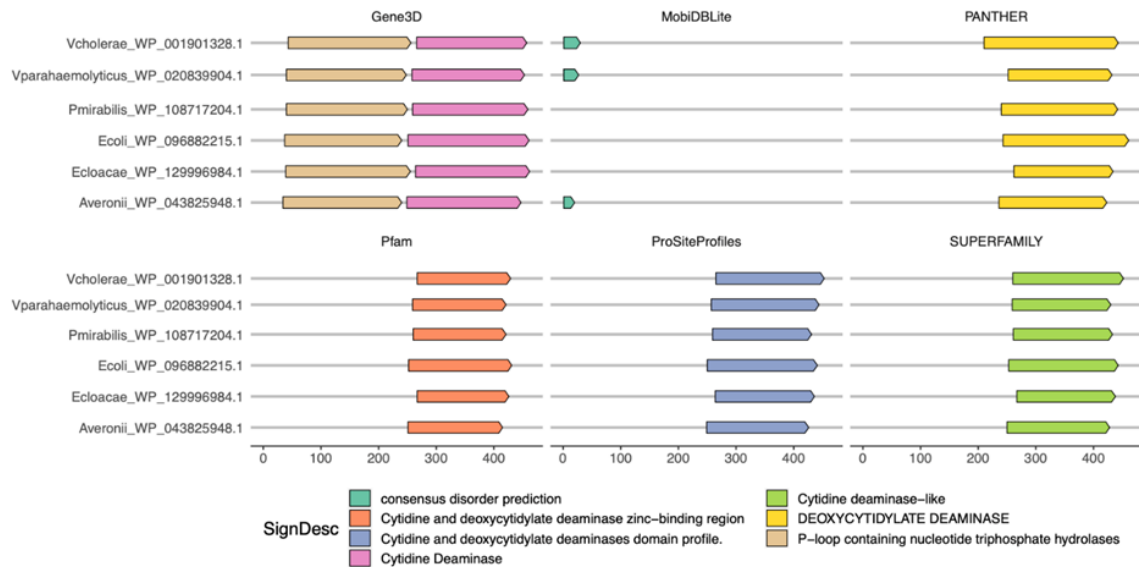

111

112 **Supplemental Figure 8. Phylogenetic analysis and domain architectures of the six AvcD**  
 113 **query proteins.**

114 (A) Phylogenetic tree of AvcD homologs from representative phyla across the tree of life. Stars  
 115 indicate the six proteobacterial starting points for the homology search, as well as the eukaryotic  
 116 *Saccharomyces cerevisiae dcd1* (triangle), explored in Fig. S9. (B) Domain architecture and  
 117 secondary structure predictions for the six proteobacterial starting points (query proteins) were  
 118 predicted using InterProScan<sup>49</sup> (Methods). Results from six main analyses are shown here for the  
 119 query proteins: Gene3D (including CATH structure database), Pfam, ProSiteProfiles, PANTHER,



120 and SUPERFAMILY protein domain profile databases, and MobiDBLite for disorder prediction.  
121 No transmembrane regions (using TMHMM) or membrane/extracellular localization were  
122 predicted for any of the proteins (using Phobius); hence not shown. Numbers (bottom) indicate  
123 the amino acid position of predicted domains and features.  
124

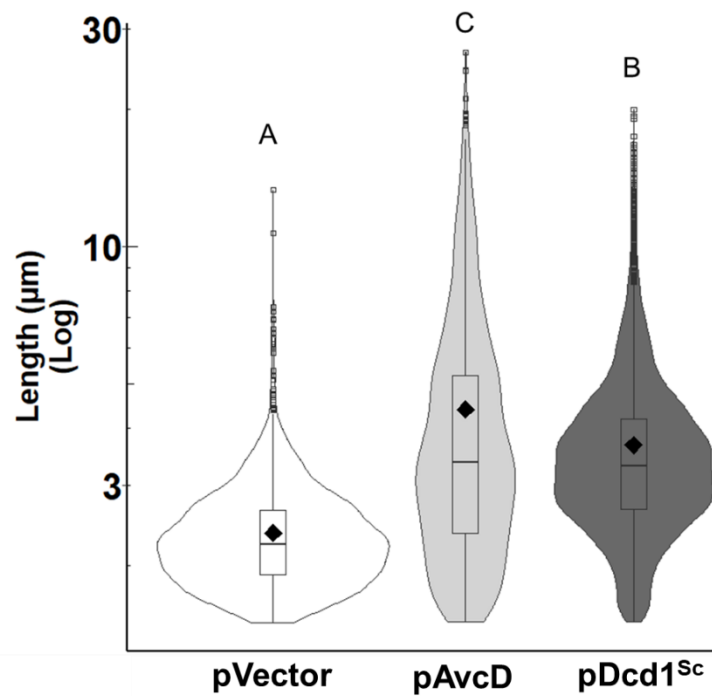

126

127

128

129

130

131

132

133

**Supplemental Figure 9. AvcD homolog from *Saccharomyces cerevisiae*, Dcd1, also induces filamentation in *E. coli*.**

Cell length distributions of *E. coli* expressing pAvcD, a P<sub>tac</sub>-inducible plasmid encoding *dcd1* from *S. cerevisiae* (pDcd1<sup>Sc</sup>), or pVector1. All cell length distributions represent ~1000-3000 cells measured per strain with summary statistics: mean (diamonds), median (horizontal black line), interquartile range (box), and data below and above the interquartile range (vertical lines). Different letters indicate significant differences at  $p < 0.05$ , according to Tukey's post-hoc test.

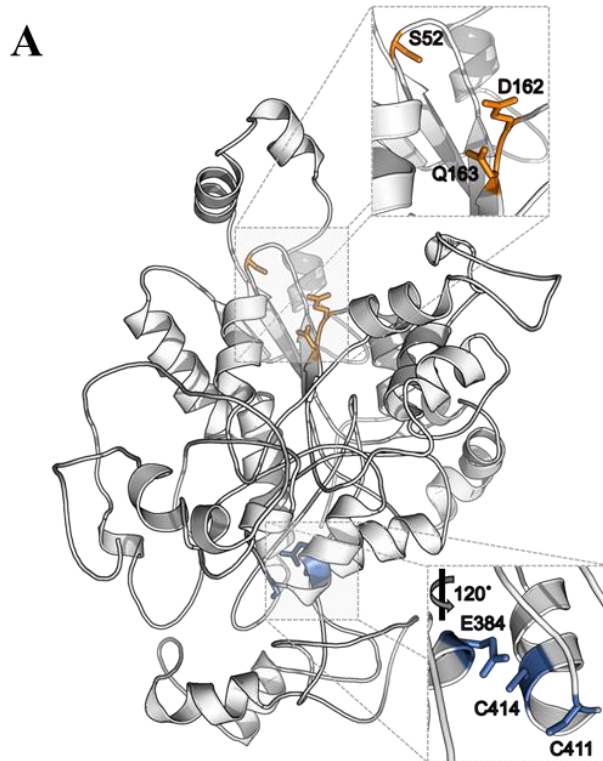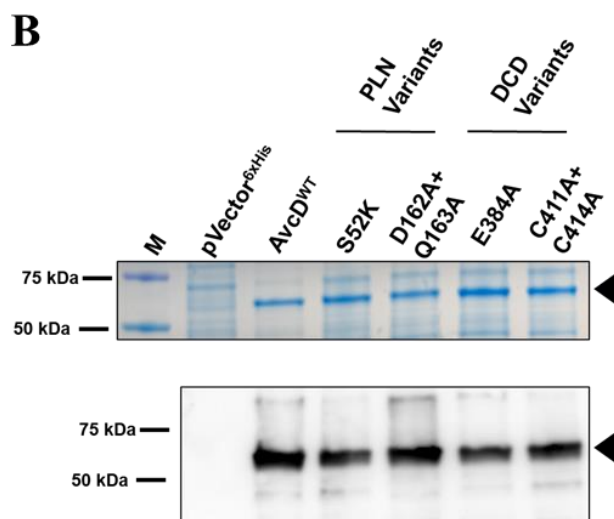

134  
135  
136  
137  
138  
139  
140  
141  
142  
143  
144  
145  
146

**Supplemental Figure 10. Mutations in conserved residues of AvcD do not affect the stability of the protein.**

(A) Phyre2<sup>12</sup> predicted structure of AvcD from *V. cholerae* El Tor. Insets highlight conserved residues of the PLN (top) and DCD (bottom) domains selected for mutagenesis. (B) Representative Coomassie stained gel (top) and anti-6x His antibody Western blot (bottom) of whole cell lysates from *E. coli* BL21(DE3) cells maintaining an empty vector (pVector<sup>6xHis</sup>), inducible C-terminal 6x histidine tagged *avcD* (WT) or *avcD* variants (S52K, D162A + Q163A, E384A, and C411A + C414A) grown in the presence of 1 mM IPTG for 3 h. Sample inputs were normalized by culture OD<sub>600</sub> and resolved by SDS-PAGE. Three biological replicates of each strain were analyzed with similar results. Black triangles correspond to the predicted molecular weight of the AvcD tagged fusions (60.6 kDa). M = molecular weight marker.

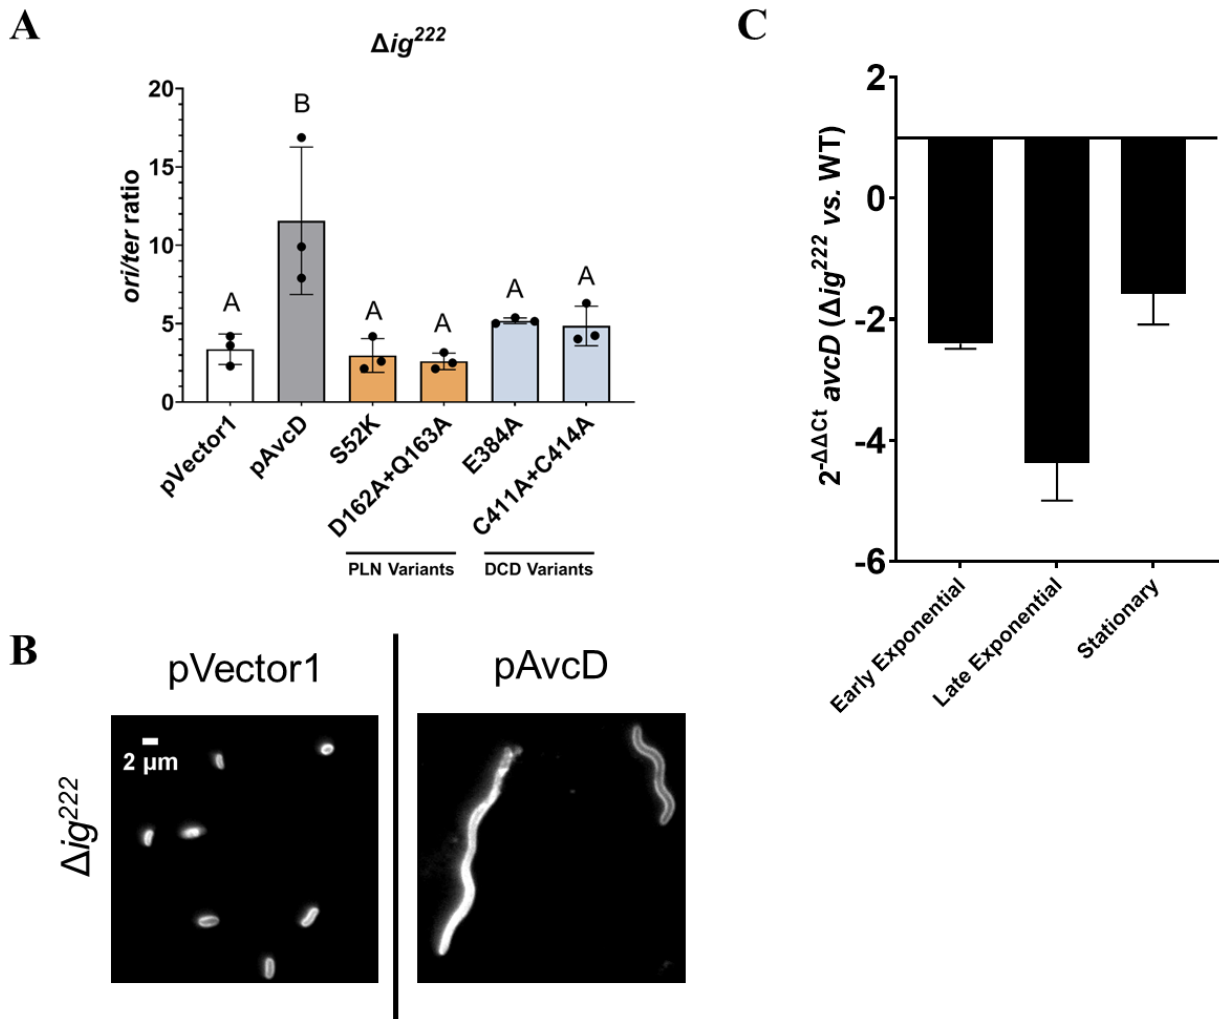

147  
 148 **Supplemental Figure 11. AvcD activity induces TLD-phenotype.**  
 149 (A) *V. cholerae* mutant expressing the indicated AvcD variants. *ori/ter* ratios of Chromosome 1 in  
 150  $\Delta ig^{222}$  *V. cholerae* strains expressing the indicated pAvcD construct and quantified using qRT-  
 151 PCR. Each bar represents the mean  $\pm$  SEM,  $n=3$ . Different letters indicate significant differences  
 152 ( $n=3$ ) at  $p < 0.05$ , according to Tukey's post-hoc test. (B) Representative images of  $\Delta ig^{222}$  cultures  
 153 maintaining an empty vector plasmid pVector 1 or pAvcD grown in the presence of 100  $\mu$ M IPTG  
 154 for 8 h. Cells were stained with FM4-64 prior to imaging and performed in biological triplicate. (C)  
 155 Relative difference in *avcD* expression between  $\Delta ig^{222}$  and WT *V. cholerae* at three different  
 156 growth phases using qRT-PCR and an endogenous *gyrA* control. Data represent the mean  $\pm$   
 157 SEM of three biological replicates.  
 158  
 159

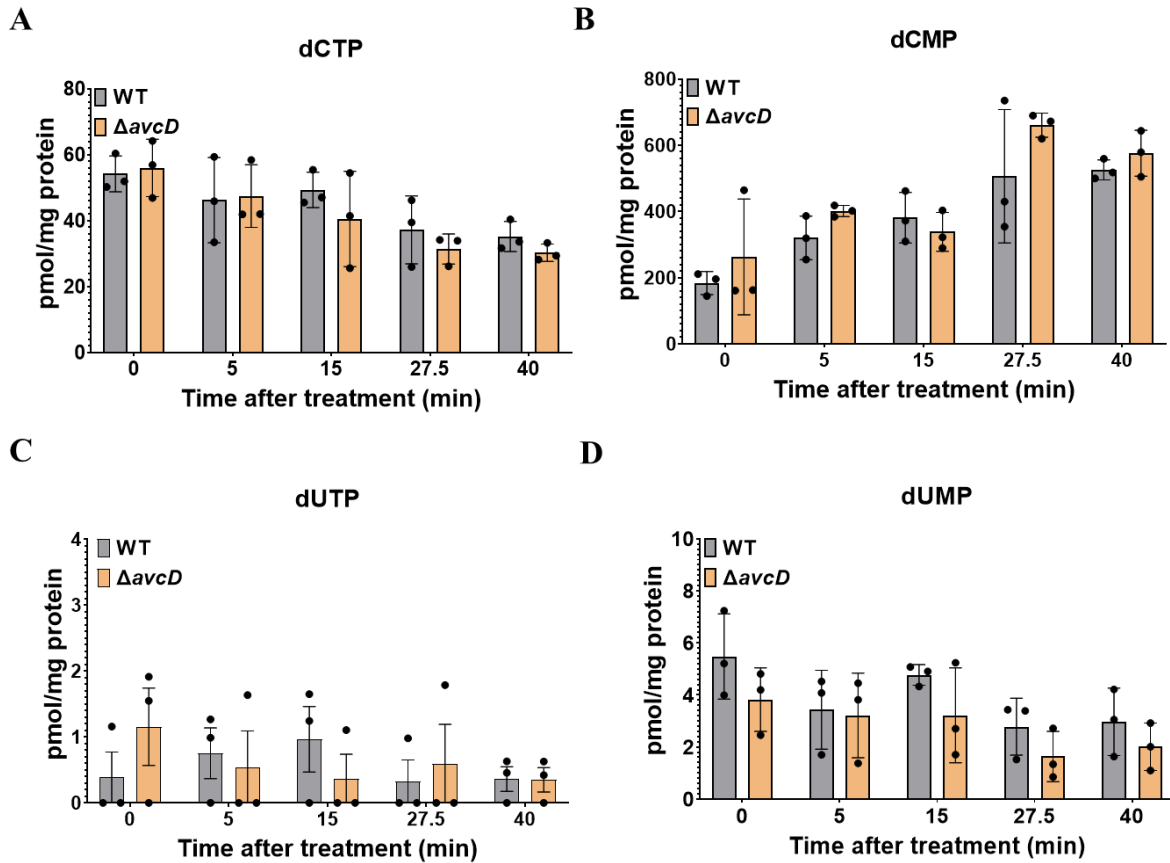

160  
161  
162  
163  
164  
165  
166  
167  
168  
169  
170  
171  
172  
173  
174  
175  
176  
177  
178  
179  
180  
181  
182  
183  
184

**Supplemental Figure 12. Cessation of global translation, by treatment with spectinomycin, does not liberate AvcD enzymatic activity.**

Intracellular concentration of dCTP (A), dCMP (B), dUTP (C), and dUMP (D) of WT and  $\Delta avcD$  *V. cholerae* during spectinomycin treatment (200  $\mu\text{g}/\text{mL}$ ) measured by UPLC-MS/MS. Data represent the mean  $\pm$  SEM of three biological replicate cultures. No statistically significant differences in nucleotide concentrations were observed between strains at any time point as determined by Two-way ANOVA with Šídák's multiple-comparison test.

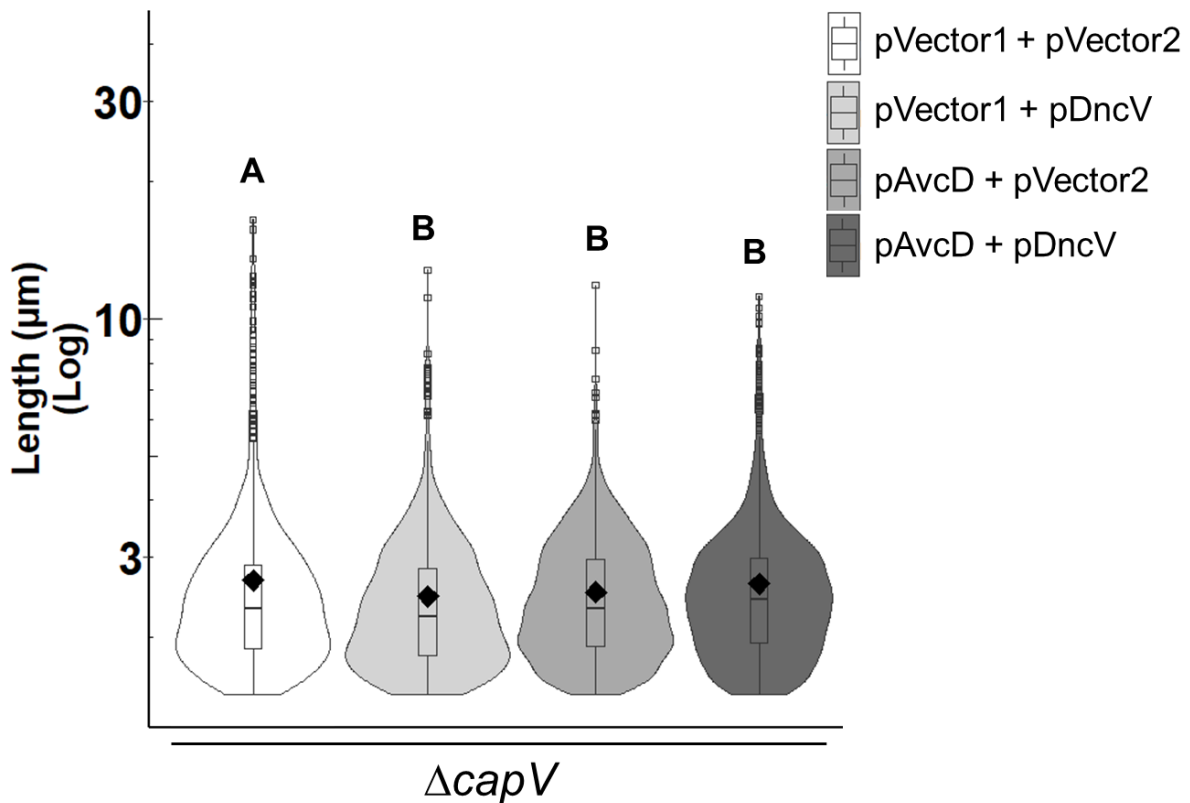

185  
 186 **Supplemental Figure 13. Ectopic expression of DncV and AvcD does not lead to**  
 187 **filamentation in the  $\Delta capV$  mutant of *V. cholerae*.**

188 Cell length distributions measured from three biological replicates of  $\Delta capV$  *V. cholerae* cultures  
 189 co-expressing either two empty vectors, pDncV and an empty vector, pAvcD and an empty vector,  
 190 or pDncV and pAvcD grown in the presence of 100  $\mu\text{M}$  IPTG for 8 h. Distributions represent  
 191 ~1200-1700 cells measured per strain. Different letters indicate significant differences at  $p < 0.05$ ,  
 192 according to Tukey's post-hoc test.

193  
 194  
 195  
 196  
 197  
 198  
 199  
 200  
 201  
 202  
 203  
 204  
 205  
 206  
 207  
 208  
 209  
 210  
 211



| AvclD systems | Coliphages |    |    |             |    |              |    |        |        |              |
|---------------|------------|----|----|-------------|----|--------------|----|--------|--------|--------------|
|               | Myoviridae |    |    | Podoviridae |    | Siphoviridae |    |        |        | Microviridae |
|               | T2         | T4 | T6 | T3          | T7 | λ-vir        | T5 | SECΦ18 | SECΦ27 | SECΦ17       |
| VC            | 2          | 2  | 2  | 8           | 1  | 1            | 2  | 1      | 1      | 1            |
| VP            | 1          | 1  | 4  | 64          | 1  | 1            | 64 | 8      | 1      | 1            |
| PM            | 1          | 8  | 1  | 1           | 1  | 1            | 1  | 1      | 1      | 1            |
| ETEC          | 1          | 1  | 1  | 64          | 1  | 1            | 1  | 4      | 4      | 4            |

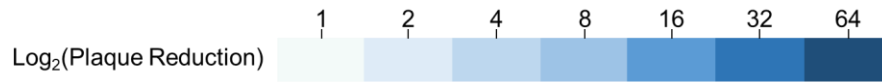

212  
213  
214  
215  
216  
217  
218  
219  
220  
221  
222  
223  
224  
225  
226  
227  
228  
229  
230  
231  
232  
233  
234  
235  
236  
237  
238  
239  
240  
241  
242  
243  
244  
245  
246  
247  
248  
249  
250  
251  
252  
253

**Supplemental Figure 14. Summary of Figure 4A.** Data are the mean of the three biological replicates rounded to the nearest fold of plaque reduction relative to empty vector control. VC = *Vibrio cholerae*, VP = *Vibrio parahaemolyticus*, PM = *Proteus mirabilis*, ETEC = *E. coli* ETEC.

**Supplementary Table 1.** Bacterial strains and phages used in this study.

| Strains                           | Name in this Study                | Relevant Characteristics                                                                                                                                                                                    | Source or reference     |
|-----------------------------------|-----------------------------------|-------------------------------------------------------------------------------------------------------------------------------------------------------------------------------------------------------------|-------------------------|
| <b><i>E. coli</i></b>             |                                   |                                                                                                                                                                                                             |                         |
| DH10b                             |                                   | <i>F-mcrA</i> $\Delta$ ( <i>mrr-hsdRMS-mcrBC</i> ) $\Phi$ 80 <i>lacZ</i> $\Delta$ M15 $\Delta$ <i>lacX74 recA1 endA1 araD139<math>\Delta</math>(<i>ara, leu</i>)7697 <i>galU galK</i> <i>lrpsL nupG</i></i> | ThermoFisher Scientific |
| BW29427                           |                                   | <i>RP4-2</i> ( <i>TetSkan1360::FRT</i> ), <i>thrB1004, lacZ58</i> (M15), $\Delta$ <i>dapA1341::[erm pir<sup>+</sup>]</i> , <i>rpsL</i> ( <i>strR</i> ), <i>thi-</i> , <i>hsdS-</i> , <i>pro-</i>            | Lab Stock               |
| BL21(DE3)                         |                                   | <i>F- ompT hsdSB</i> ( <i>rB -mB +</i> ) <i>gal dcm</i> (DE3)                                                                                                                                               | Lab Stock               |
| MG1655                            |                                   | <i>F-lambda- ilvG- rfb-50 rph-1</i>                                                                                                                                                                         | Lab Stock               |
| 078:H11 H10407 (ETEC)             | ETEC                              | Wild type                                                                                                                                                                                                   | 41                      |
| <b><i>V. cholerae</i></b>         |                                   |                                                                                                                                                                                                             |                         |
| C6706str2                         | WT and VC                         | Wild type O1 EI Tor; Sm <sup>R</sup>                                                                                                                                                                        | 30                      |
| CR01                              | $\Delta$ VSP-1                    | O1 EI Tor $\Delta$ VSP-1                                                                                                                                                                                    | This study              |
| CR02                              | $\Delta$ VSP-2                    | O1 EI Tor $\Delta$ VSP-2                                                                                                                                                                                    | This study              |
| CR03                              | $\Delta$ VSP-1/2                  | O1 EI Tor $\Delta$ VSP-1/2                                                                                                                                                                                  | This study              |
| BYH206                            | $\Delta$ <i>ig</i> <sup>222</sup> | O1 EI Tor $\Delta$ <i>ig</i> <sup>222</sup> between <i>vc0175-vc0176</i> position in N16961 chromosome I [177,230-177,008]                                                                                  | This study              |
| BYH207                            | $\Delta$ <i>vc0176</i>            | O1 EI Tor $\Delta$ <i>vc0176</i>                                                                                                                                                                            | This study              |
| GS05                              | $\Delta$ <i>avcD</i>              | O1 EI Tor $\Delta$ <i>avcD</i>                                                                                                                                                                              | This study              |
| WLN5105                           | $\Delta$ <i>capV</i>              | O1 EI Tor $\Delta$ <i>capV</i>                                                                                                                                                                              | 8                       |
| <b><i>V. parahaemolyticus</i></b> |                                   |                                                                                                                                                                                                             |                         |
| O1:Kuk str. FDA_R31               | VP                                | Wild type                                                                                                                                                                                                   | 39                      |
| <b><i>P. mirabilis</i></b>        |                                   |                                                                                                                                                                                                             |                         |
| AR379                             | PM                                | Wild type                                                                                                                                                                                                   | 40                      |
| <b><i>S. cerevisiae</i></b>       |                                   |                                                                                                                                                                                                             |                         |
| yMK839                            | Sc                                | <i>MATa leu2-3 trp1 ura3-52</i>                                                                                                                                                                             | 11                      |
| <b>Phages</b>                     |                                   |                                                                                                                                                                                                             |                         |
| T2                                | T2                                | Wild type                                                                                                                                                                                                   | ATCC                    |
| T3                                | T3                                | Wild type                                                                                                                                                                                                   | ATCC                    |
| T4                                | T4                                | Wild type                                                                                                                                                                                                   | ATCC                    |
| T5                                | T5                                | Wild type                                                                                                                                                                                                   | ATCC                    |
| T6                                | T6                                | Wild type                                                                                                                                                                                                   | ATCC                    |
| T7                                | T7                                | Wild type                                                                                                                                                                                                   | ATCC                    |
| $\lambda$ virulent                | $\lambda$ vir                     | Wild type                                                                                                                                                                                                   | Gift from M. Laub       |
| SEC $\phi$ 17                     | SEC $\phi$ 17                     | Wild type                                                                                                                                                                                                   | Gift from M. Laub       |
| SEC $\phi$ 18                     | SEC $\phi$ 18                     | Wild type                                                                                                                                                                                                   | Gift from M. Laub       |
| SEC $\phi$ 27                     | SEC $\phi$ 27                     | Wild type                                                                                                                                                                                                   | Gift from M. Laub       |

258 **Supplementary Table 2: Plasmids Descriptions**

| Plasmids               | Name in this Manuscript             | Relevant characteristics                                                                                 | Source or Reference |
|------------------------|-------------------------------------|----------------------------------------------------------------------------------------------------------|---------------------|
| pEVS141                | pVector1                            | pEVS143 without P <sub>tac</sub> ; Km <sup>r</sup>                                                       | 34                  |
| pEVS143                |                                     | Broad-host range P <sub>tac</sub> overexpression vector; Km <sup>r</sup>                                 | 32                  |
| pMMB67EH               | pVector2                            | Broad-host range P <sub>tac</sub> overexpression vector; Amp <sup>r</sup>                                | 33                  |
| pKAS32                 |                                     | Suicide vector for mutant construction, Amp <sup>r</sup>                                                 | 31                  |
| pET28b                 | pVector <sup>6xHis</sup>            | T7 promoter; Km <sup>r</sup>                                                                             | Novagen             |
| pBRP353                | pDncV                               | pMMB67EH:: <i>dncV</i> ; Amp <sup>r</sup>                                                                | 8                   |
| pCMW204                | pAvcD                               | pEVS143:: <i>avcD</i> ; Km <sup>r</sup>                                                                  | This study          |
| pGBS87                 | pAvcD/pAvcD <sup>VC</sup>           | pMMB67EH:: <i>avcD</i> ; Amp <sup>r</sup>                                                                | This study          |
| pGBS65                 | pAvcD <sup>6xHis</sup>              | pET28b:: <i>avcD-6xHis C-term</i> ; Km <sup>r</sup> (*only* in <i>E. coli</i> BL21(DE3))                 | This study          |
| pGBS98                 | pAvcD <sup>6xHis</sup>              | pEVS143:: <i>avcD-6xHis C-term</i> ; Km <sup>r</sup> (*only* in <i>V. cholerae</i> )                     | This study          |
| pAvcD <sup>4-532</sup> |                                     | pET28b:: <i>avcD<sup>4-532}-6xHis N-term</sup></i> ; Km <sup>r</sup>                                     | This study          |
| pGBS71                 | pAvcD <sup>E384A</sup>              | pEVS143:: <i>avcD-E384A</i> ; Km <sup>r</sup>                                                            | This study          |
| pGBS82                 | pAvcD <sup>E384A</sup>              | pET28b:: <i>avcD-E384A-6xHis C-term</i> ; Km <sup>r</sup> (*only* for in vitro and western blot)         | This study          |
| pGBS81                 | pAvcD <sup>C411A+C414A</sup>        | pEVS143:: <i>avcD-C411A+C414A</i> ; Km <sup>r</sup>                                                      | This study          |
| pGBS75                 | pAvcD <sup>C411A+C414A</sup>        | pET28b:: <i>avcD-C411A+C414A-6xHis C-term</i> ; Km <sup>r</sup>                                          | This study          |
| pGBS103                | pAvcD <sup>S52K</sup>               | pEVS143:: <i>avcD-S52K</i> ; Km <sup>r</sup>                                                             | This study          |
| pGBS114                | pAvcD <sup>S52K</sup>               | pET28b:: <i>avcD-S52K-6xHis C-term</i> ; Km <sup>r</sup>                                                 | This study          |
| pGBS106                | pAvcD <sup>D162A+Q163A</sup>        | pEVS143:: <i>avcD-D162A+Q163A</i> ; Km <sup>r</sup>                                                      | This study          |
| pGBS116                | pAvcD <sup>D162A+Q163A</sup>        | pET28b:: <i>avcD-D162A+Q163A-6xHis C-term</i> ; Km <sup>r</sup>                                          | This study          |
| pGBS80                 | pI <sub>g</sub> <sup>222</sup>      | pEVS143:: <i>Ig<sup>222</sup></i> , (position in N16961 chromosome I [177,230-177,008]); Km <sup>r</sup> | This study          |
| pGBS108                | pI <sub>g</sub> <sup>222-STOP</sup> | pEVS143:: <i>Ig<sup>222}-1C&gt;T, 2T&gt;A</sup></i> ; Km <sup>r</sup>                                    | This study          |
| pGBS110                | pAvcl                               | pEVS143:: <i>avcl</i> (position in N16961 chromosome I [177,181-177,008]); Km <sup>r</sup>               | This study          |
| pAW01                  | pAvcl <sup>RBS-less</sup>           | pEVS143:: <i>avcl</i> without RBS; Km <sup>r</sup>                                                       | This study          |
| pGBS111                | pAvcl <sup>STOP</sup>               | pEVS143:: <i>avcl-1A&gt;T, 2T&gt;A, 3G&gt;A</i> ; Km <sup>r</sup>                                        | This study          |
| pGBS118                | pAvcl <sup>InteriorSTOP</sup>       | pEVS143:: <i>avcl-17A&gt;T, 18T&gt;A, 19G&gt;A</i> ; Km <sup>r</sup>                                     | This study          |
| pBYH49                 | pAvcl <sup>49-186</sup>             | pEVS143:: <i>Ig<sup>222</sup> truncation (49-186 NT)</i> ; Km <sup>r</sup>                               | This study          |
| pBYH52                 | pAvcl <sup>49-204</sup>             | pEVS143:: <i>Ig<sup>222</sup> truncation (49-204 NT)</i> ; Km <sup>r</sup>                               | This study          |
| pBYH53                 | pAvcl <sup>49-214</sup>             | pEVS143:: <i>Ig<sup>222</sup> truncation (49-214 NT)</i> ; Km <sup>r</sup>                               | This study          |

|         |                                     |                                                                                                                                                                                |            |
|---------|-------------------------------------|--------------------------------------------------------------------------------------------------------------------------------------------------------------------------------|------------|
| pBYH54  | pAvcl <sup>49-218</sup>             | pEVS143:: <i>Ig</i> <sup>222</sup> truncation (49-218 NT); Km <sup>r</sup>                                                                                                     | This study |
| pBYH55  | pAvcl <sup>66-222</sup>             | pEVS143:: <i>Ig</i> <sup>222</sup> truncation (66-222 NT); Km <sup>r</sup>                                                                                                     | This study |
| pBYH56  | pAvcl <sup>86-222</sup>             | pEVS143:: <i>Ig</i> <sup>222</sup> truncation (86-222 NT); Km <sup>r</sup>                                                                                                     | This study |
| pBYH57  | pAvcl <sup>123-222</sup>            | pEVS143:: <i>Ig</i> <sup>222</sup> truncation (123-222 NT); Km <sup>r</sup>                                                                                                    | This study |
| pGBS124 | pAvcD <sup>ETEC</sup>               | pEVS143:: <i>avcD</i> from <i>Escherichia coli</i> O78:H11 H10407 (ETEC); Km <sup>r</sup> (*only* for mass spec experiment)                                                    | This study |
| pGBS125 | pAvcl <sup>ETEC</sup>               | pEVS143:: <i>avcl</i> from <i>E. coli</i> O78:H11 H10407 (ETEC); Km <sup>r</sup>                                                                                               | This study |
| pGBS126 | pAvcD <sup>ETEC</sup>               | pMMB67EH:: <i>avcD</i> from ETEC; Amp <sup>r</sup>                                                                                                                             | This study |
| pAW07   | pAvcl <sup>VP</sup>                 | pEVS143:: <i>avcl</i> from <i>V. parahaemolyticus</i> O1:Kuk str. FDA_R31; Km <sup>r</sup>                                                                                     | This study |
| pAW06   | pAvcD <sup>VP</sup>                 | pMMB67EH:: <i>avcD</i> from <i>V. parahaemolyticus</i> O1:Kuk str. FDA_R31; Amp <sup>r</sup>                                                                                   | This study |
| pAW02   | pAvcl <sup>PM</sup>                 | pEVS143:: <i>avcl</i> from <i>P. mirabilis</i> AR379; Km <sup>r</sup>                                                                                                          | This study |
| pAW04   | pAvcD <sup>PM</sup>                 | pMMB67EH:: <i>avcD</i> from <i>P. mirabilis</i> AR379; Amp <sup>r</sup>                                                                                                        | This study |
| pBRP15  |                                     | pMMB67EH without P <sub>tac</sub> ; Amp <sup>r</sup>                                                                                                                           | This study |
| pBYH64  |                                     | pBRP15:: <i>avcl-avcD</i> operon with its upstream intergenic region position in <i>V. cholerae</i> N16961 [177,759-176,932]; Amp <sup>r</sup>                                 | This study |
| pBYH67  |                                     | pBRP15:: <i>avcl-avcD</i> operon with its upstream intergenic region position in <i>V. parahaemolyticus</i> O1:Kuk str. FDA_R31 (CP006004) [468,152-466,174]; Amp <sup>r</sup> | This study |
| pBYH65  |                                     | pBRP15:: <i>avcl-avcD</i> operon with its upstream intergenic region position in <i>P. mirabilis</i> AR379 (NZ_CP029133), [3,698,504-3,700,828]; Amp <sup>r</sup>              | This study |
| pBYH63  |                                     | pBRP15:: <i>avcl-avcD</i> operon with its upstream intergenic region position in ETEC (NC_017723.1), [2,280-4,414]; Amp <sup>r</sup>                                           | This study |
| pBYH69  |                                     | pEVS143:: <i>dcd1</i> from <i>Saccharomyces cerevisiae</i> ; Km <sup>r</sup>                                                                                                   | This study |
| pBYH81  | pAvcID <sup>VP-avcDS47K</sup>       | pBYH67:: <i>avcD</i> -S47K; Amp <sup>r</sup>                                                                                                                                   | This study |
| pBYH82  | pAvcID <sup>VP-avcDE376K</sup>      | pBYH67:: <i>avcD</i> -E376K; Amp <sup>r</sup>                                                                                                                                  | This study |
| pBYH83  | pAvcID <sup>VP-avcDS47K+E376K</sup> | pBYH67:: <i>avcD</i> -S47K+E376K; Amp <sup>r</sup>                                                                                                                             | This study |
| pCRR01  |                                     | Deletion construct for ΔVSP-1, Amp <sup>r</sup>                                                                                                                                | This study |
| pCRR02  |                                     | Deletion construct for ΔVSP-2, Amp <sup>r</sup>                                                                                                                                | This study |
| pBYH36  |                                     | Deletion construct for Δ <i>Ig</i> <sup>222</sup> , Amp <sup>r</sup>                                                                                                           | This study |
| pBYH37  |                                     | Deletion construct for Δ <i>vc0176</i> , Amp <sup>r</sup>                                                                                                                      | This study |
| pGBS88  |                                     | Deletion construct for Δ <i>avcD</i> , Amp <sup>r</sup>                                                                                                                        | This study |



|         |                                                                                                             |                                                                |            |
|---------|-------------------------------------------------------------------------------------------------------------|----------------------------------------------------------------|------------|
| CMW3165 | <i>avcD</i> <sup>ETEC</sup> F BamHI (pMMB67EH-AvcD <sup>ETEC</sup> )                                        | CCTGCAGGTCGACTCTAGAGTTAAATCAAGTCA<br>TCTTGTTTTGG               | This study |
| CMW3166 | <i>avc</i> <sup>ETEC</sup> F EcoRI + RBS (pEVS143-AvcI <sup>ETEC</sup> )                                    | ACAGCCTCGACAGGCCTAGGAGGAGCTAAGGA<br>AGCTAAAATGTCAAACCAATTAACCG | This study |
| CMW3167 | <i>avc</i> <sup>ETEC</sup> F BamHI (pEVS143-AvcI <sup>ETEC</sup> )                                          | GCTTGCTCAATCAATCACCGCTAATCAAGTATTA<br>TTTCTTTCTTTAGTATTTTTATC  | This study |
| CMW3180 | <i>avc</i> <sup>VP</sup> F EcoRI + RBS (pEVS143-AvcI <sup>VP</sup> )                                        | ACAGCCTCGACAGGCCTAGGAGGAGCTAAGGA<br>AGCTAAAATGGTTACAAATTTAAATG | This study |
| CMW3181 | <i>avc</i> <sup>VP</sup> R BamHI (pEVS143-AvcI <sup>VP</sup> )                                              | GCTTGCTCAATCAATCACCGTTACCAACGAATTT<br>TCTGTGCGGCTCTTAAAAG      | This study |
| CMW3184 | <i>avcD</i> <sup>VP</sup> F EcoRI + RBS (pMMB67EH-AvcD <sup>VP</sup> )                                      | CAATTTACACAGGAAACAGAGGAGCTAAGGAA<br>GCTAAAATGGGAAAATCCTCTA     | This study |
| CMW3185 | <i>avcD</i> <sup>VP</sup> R BamHI (pMMB67EH-AvcD <sup>VP</sup> )                                            | CCTGCAGGTCGACTCTAGAGTTATTCAATAGTG<br>GCTTCTACTTGTGGCTTTGTGAATG | This study |
| CMW3189 | <i>avcI</i> F EcoRI (pEVS143-AvcI)                                                                          | ACAGCCTCGACAGGCCTAGGATGATTACAAGCA<br>TTCATGAATATAGAAAACGCTTC   | This study |
| CMW3192 | <i>avc</i> <sup>PM</sup> F EcoRI + RBS (pEVS143-AvcO <sup>PM</sup> )                                        | ACAGCCTCGACAGGCCTAGGAGGAGCTAAGGA<br>AGCTAAAATGAACGTTCAAC       | This study |
| CMW3193 | <i>avc</i> <sup>PM</sup> R BamHI (pEVS143-AvcI <sup>PM</sup> )                                              | GCTTGCTCAATCAATCACCGTTACCAATCTAAC<br>GTGTCTGCTACAGCTGC         | This study |
| CMW3196 | <i>avcD</i> <sup>VP</sup> F EcoRI + RBS (pMMB67EH-AvcD <sup>PM</sup> )                                      | CAATTTACACAGGAAACAGAGGAGCTAAGGAA<br>GCTAAAATGGGTAATCC          | This study |
| CMW3197 | <i>avcD</i> <sup>VP</sup> R BamHI (pMMB67EH-AvcD <sup>PM</sup> )                                            | CCTGCAGGTCGACTCTAGAGTTAACTTCTCTCT<br>TCACCTAAACGAAGATTTAC      | This study |
| CMW3200 | <i>avc</i> <sup>49-204</sup> R BamHI (pEVS143-AvcI <sup>49-204</sup> )                                      | GCTTGCTCAATCAATCACCGTGCAGCACGCAAA<br>AGATTG                    | This study |
| CMW3201 | <i>avc</i> <sup>49-214</sup> R BamHI (pEVS143-AvcI <sup>49-214</sup> )                                      | GCTTGCTCAATCAATCACCGGGATTTTTTGTGC<br>AGCAC                     | This study |
| CMW3202 | <i>avc</i> <sup>49-218</sup> R BamHI (pEVS143-AvcI <sup>49-218</sup> )                                      | GCTTGCTCAATCAATCACCGCAATGGATTTTTTG<br>TGCAGCACGCAAAAAGA        | This study |
| CMW3203 | <i>avc</i> <sup>66-222</sup> F EcoRI + RBS (pEVS143-AvcI <sup>66-222</sup> )                                | ACAGCCTCGACAGGCCTAGGAGGAGCTAAGGA<br>AGCTAAAGAATATAGAAACG       | This study |
| CMW3204 | <i>avc</i> <sup>86-222</sup> F EcoRI + RBS (pEVS143-AvcI <sup>86-222</sup> )                                | ACAGCCTCGACAGGCCTAGGAGGAGCTAAGGA<br>AGCTAAAATAGCGACAAAAAC      | This study |
| CMW3205 | <i>avc</i> <sup>123-222</sup> F EcoRI + RBS (pEVS143-AvcI <sup>123-222</sup> )                              | ACAGCCTCGACAGGCCTAGGAGGAGCTAAGGA<br>AGCTAAAAGACACTAGCG         | This study |
| CMW3306 | <i>avcI-avcD</i> w/ upstream intergenic regions from <i>V. cholerae</i> F EcoRI (pAvcI-AvcD <sup>VC</sup> ) | CGGGAAACCTGTCTGTGCCAGCTAGTCTTGAT<br>GCTCTC                     | This study |
| CMW3307 | <i>avcI-avcD</i> w/ upstream intergenic                                                                     | CCTGCAGGTCGACTCTAGAGATAGAGACACTAT<br>ATTTAGTGTTTTAATTAAC       | This study |



|                                  |                                                                                                                     |                                                              |            |
|----------------------------------|---------------------------------------------------------------------------------------------------------------------|--------------------------------------------------------------|------------|
|                                  | regions from <i>V. cholerae</i> R BamHI (pAvcl-AvcD <sup>VC</sup> )                                                 |                                                              |            |
| CMW3308                          | <i>avcl-avcD</i> w/ upstream intergenic regions from ETEC F EcoRI (pAvcl-AvcD <sup>ETEC</sup> )                     | CGGGAAACCTGTCGTGCCAGTTAAATCAAGTCA<br>TCTTGT TTTGGTTC         | This study |
| CMW3309                          | <i>avcl-avcD</i> w/ upstream intergenic regions from ETEC R BamHI (pAvcl-AvcD <sup>ETEC</sup> )                     | CCTGCAGGTGCGACTCTAGAGAGGCTCCGCTGA<br>GAAAAAATTC              | This study |
| CMW3310                          | <i>avcl-avcD</i> w/ upstream intergenic regions from <i>P. mirabilis</i> F EcoRI (pAvcl-AvcD <sup>PM</sup> )        | CGGGAAACCTGTCGTGCCAGTTAACTTCTCTCT<br>TCACCTAAAC              | This study |
| CMW3311                          | <i>avcl-avcD</i> w/ upstream intergenic regions from <i>P. mirabilis</i> R BamHI (pAvcl-AvcD <sup>PM</sup> )        | CCTGCAGGTGCGACTCTAGAGTGCTTTAACTCCT<br>AAAGG                  | This study |
| CMW3312                          | <i>avcl-avcD</i> w/ upstream intergenic regions from <i>V. parahaemolyticus</i> F EcoRI (pAvcl-AvcD <sup>VP</sup> ) | CGGGAAACCTGTCGTGCCAGTTATTCAATAGTG<br>GCTTCTAC                | This study |
| CMW3313                          | <i>avcl-avcD</i> w/ upstream intergenic regions from <i>V. parahaemolyticus</i> R BamHI (pAvcl-AvcD <sup>VP</sup> ) | TGCCTGCAGGTGCGACTCTAGAGTCACTTTGCTG<br>ATTTAAGCAGAT           | This study |
| CMW3335                          | <i>dcd1<sup>Sc</sup></i> F EcoRI (pEVS143-Dcd1)                                                                     | ACAGCCTCGACAGGCCTAGGAGGAGCTAAGGA<br>AGCTAAAATGTTAATTGGTGTAAG | This study |
| CMW3336                          | <i>dcd1<sup>Sc</sup></i> R BamHI (pEVS143-Dcd1)                                                                     | GCTTGCTCAATCAATCACCGTTAAATCATCACAA<br>TTCTTGGTTC             | This study |
| EWAvcDFwd                        | <i>avcD<sup>4-532</sup></i> F NdeI (pAvcD <sup>4-532</sup> ) For protein purification                               | GTGCCGCGCGGCAGCCATATGAATAAGTCCTC<br>CGCAA                    | This study |
| EWAvcDrev                        | <i>avcD<sup>4-532</sup></i> R XhoI (pAvcD <sup>4-532</sup> ) For protein purification                               | TGGTGGTGGTGGTGGTGCTTAGTCTTGGATGCT<br>CTCTTCTT                | This study |
| <b>Site-directed Mutagenesis</b> |                                                                                                                     |                                                              |            |
| CMW3011                          | <i>avcD</i> (E384A) F (pEVS143-AvcD <sup>E384A</sup> & pET28b-AvcD <sup>E384A</sup> )                               | CAAGAGCGGTTTCATGCTGCAATGGATTCTCTTA<br>TAGC                   | This study |
| CMW3012                          | <i>avcD</i> (E384A) R (pEVS143-AvcD <sup>E384A</sup> & pET28b-AvcD <sup>E384A</sup> )                               | GCTATAAGAGAATCCATTGCAGCATGAACCGCT<br>CTTG                    | This study |

|                      |                                                                                   |                                                                  |            |
|----------------------|-----------------------------------------------------------------------------------|------------------------------------------------------------------|------------|
| CMW3013              | <i>avcD</i> (C411A + C414A) F (pEVS143-AvcD <sup>C411A+C414A</sup> )              | TATATGTTACGACATATCCGGCTCACAAACGCTG<br>CGCGACACATCGTTGCTG         | This study |
| CMW3014              | <i>avcD</i> (C411A + C414A) R (pEVS143-AvcD <sup>C411A+C414A</sup> )              | CAGCAACGATGTGTGCGCGCAGCGTTGTGAGCC<br>GGATATGTGCGTAACATATA        | This study |
| CMW3021              | <i>avcD</i> (K55A) F (pEVS143-AvcD <sup>K55A</sup> )                              | GCTATTGGCTCTGGTGTAGCGGCATTAAAAGAG<br>AGTTTAGTTAGTTCTCTTGAGACATAT | This study |
| CMW3022              | <i>avcD</i> (K55A) R (pEVS143-AvcD <sup>K55A</sup> )                              | ATATGTCTCAAGAGAATACTAACTCTCTTTT<br>AATGCCGCTACACCAGAGCCAATAGC    | This study |
| CMW3104              | <i>avcD</i> (D162A + Q163A) F (pEVS143-AvcD <sup>D162A+Q163A</sup> )              | CGCATACATCATCGCGGCGTTAAAGCACCCCTGA<br>TGAAATCAAATTCC             | This study |
| CMW3105              | <i>avcD</i> (D162A + Q163A) R (pEVS143-AvcD <sup>Q162A+Q163A</sup> )              | GGAATTTGATTTTCATCAGGGTGCTTTAACGCCG<br>CGATGATGTATGCG             | This study |
| CMW3110              | <i>avcD</i> (S52K) F (pEVS143-AvcD <sup>S52K</sup> )                              | CCTCTGTGGGGCTATTGGCAAAGGTGTAAAGG<br>CATTAAAAGAGAG                | This study |
| CMW3111              | <i>avcD</i> (S52K) R (pEVS143-AvcD <sup>S52K</sup> )                              | CTCTCTTTTAATGCCTTTACACCTTTGCCAATAG<br>CCCCACAGAGG                | This study |
| CMW3112              | <i>avcD</i> (S52P) F (pEVS143-AvcD <sup>S52P</sup> )                              | CCTCTGTGGGGCTATTGGCCCCGGGTGTAAAGG<br>CATTAAAAGAGAG               | This study |
| CMW3113              | <i>avcD</i> (S52P) R (pEVS143-AvcD <sup>S52P</sup> )                              | CTCTCTTTTAATGCCTTTACACCCGGGCCAATA<br>GCCCCACAGAGG                | This study |
| CMW3114              | <i>avcD</i> (S52W) F (pEVS143-AvcD <sup>S52W</sup> )                              | CCTCTGTGGGGCTATTGGCTGGGGTGTAAAGG<br>CATTAAAAGAGAG                | This study |
| CMW3115              | <i>avcD</i> (S52K) R (pEVS143-AvcD <sup>S52W</sup> )                              | CTCTCTTTTAATGCCTTTACACCCCAGCCAATAG<br>CCCCACAGAGG                | This study |
| CMW3118              | <i>avcI</i> (interior alternative frame stop) F (pEVS143-AvcI17A>T, 18T>A, 19G>A) | AAGGAAGCTAAAATGATTACAAGCATTCTAAAAT<br>ATAGAAACGCTTCTAATAGCG      | This study |
| CMW3119              | <i>avcI</i> (interior alternative frame stop) R (pEVS143-AvcI17A>T, 18T>A, 19G>A) | CGCTATTAGAAGCGTTTCTATATTTTAGAATGCT<br>TGTAATCATTTTAGCTTCCTT      | This study |
| CMW3448              | <i>avcD</i> <sup>VP</sup> (S47K) F                                                | ATTGGTCTTTGTGGAGCTATAGGCAAGGGTGTG<br>AAAGCACTAAAAGATAAC          | This study |
| CMW3449              | <i>avcD</i> <sup>VP</sup> (S47K) R                                                | GTTATCTTTTAGTGCTTTTACACCCTTGCCTATA<br>GCTCCACAAAGACCAAT          | This study |
| CMW3450              | <i>avcD</i> <sup>VP</sup> (E376A) F                                               | GAGAGCTGTACACGCAGCAATGGATGCCATTGT<br>TG                          | This study |
| CMW3451              | <i>avcD</i> <sup>VP</sup> (E376A) R                                               | CAACAATGGCATCCATTGCTGCGTGTACAGCTC<br>TC                          | This study |
| <b>Gene Deletion</b> |                                                                                   |                                                                  |            |
| CMW2794              | ΔVSP-2 up <sup>4</sup> F; CR02 & CR03                                             | GTGGAATTCCTGGGAGAGCTCGGCTTGTTCACT<br>ATCGTAATAATGC               | This study |
| CMW2795              | ΔVSP-2 up R; CR02 & CR03                                                          | GGAGGGGCCACCACTGGGAGGGCACCAGATTC                                 | This study |
| CMW2796              | ΔVSP-2 down <sup>5</sup> F; CR02 & CR03                                           | GCCCTCCAGTGGTGGCCCCTCCAGGT                                       | This study |

|                                         |                                              |                                                              |            |
|-----------------------------------------|----------------------------------------------|--------------------------------------------------------------|------------|
| CMW2797                                 | $\Delta$ VSP-2 down R;<br>CR02 & CR03        | AGCTATAGTTCTAGAGGTACGGGCATTAAGGTG<br>GTGGAAACCG              | This study |
| CMW2814                                 | $\Delta$ VSP-1 up F;<br>CR01 & CR03          | GTGGAATTCCTGGGAGAGCTGGCTTTACTGTTA<br>TTCGC                   | This study |
| CMW2815                                 | $\Delta$ VSP-1 up R;<br>CR01 & CR03          | TACCATGTAGTAGCGGTATCGAGATTCC                                 | This study |
| CMW2816                                 | $\Delta$ VSP-1 down F;<br>CR01 & CR03        | GATACCGCTACTACATGGTAACGAACCTCTTC                             | This study |
| CMW2817                                 | $\Delta$ VSP-1 down R;<br>CR01 & CR03        | AGCTATAGTTCTAGAGGTACCGCTAAGTTTGTG<br>GATGC                   | This study |
| CMW2970                                 | $\Delta$ vc0176 up F;<br>BYH207              | ATAACAATTTGTGGAATTCCTGGGAGAGCTGGG<br>AATCGAATATTGAGAG        | This study |
| CMW2971                                 | $\Delta$ vc0176 up R;<br>BYH207              | ATATAGTGTCTCTATTTATGGCTCATAATCTTGA<br>AG                     | This study |
| CMW2972                                 | $\Delta$ vc0176 down F;<br>BYH207            | GATTATGAGCCATAAATAGAGACACTATATTTAG<br>TGTTTAATTAAC           | This study |
| CMW2973                                 | $\Delta$ vc0176 down R;<br>BYH207            | TGCGCATGCTAGCTATAGTTCTAGAGGTACTAT<br>GAACTTATTTCTATACTCTCAG  | This study |
| CMW3067                                 | $\Delta$ avcD up F; GS05                     | GTGGAATTCCTGGGAGAGCTACTATATTTAGTG<br>TTTAATTAACAAAAAC        | This study |
| CMW3068                                 | $\Delta$ avcD up R; GS05                     | CAGACTAAAGCCTGAAATTATGAACTTATTTCT<br>ATAC                    | This study |
| CMW3069                                 | $\Delta$ avcD down F; GS05                   | TAATTTCAAGCTTTAGTCTGGAAAATTCACTTTT<br>C                      | This study |
| CMW3070                                 | $\Delta$ avcD down R;<br>GS05                | AGCTATAGTTCTAGAGGTACACATGGAGCATGA<br>TCAGG                   | This study |
| CMW3071                                 | $\Delta$ Ig <sup>222</sup> up F; BYH206      | ATAACAATTTGTGGAATTCCTGGGAGAGCTTCT<br>CAAAGAAGCACGTAAAAAAG    | This study |
| CMW3072                                 | $\Delta$ Ig <sup>222</sup> up R; BYH206      | CAAGAATTAACGTGGTAAAGTGCGCACATTCTA<br>C                       | This study |
| CMW3073                                 | $\Delta$ Ig <sup>222</sup> down F;<br>BYH206 | AATGTGCGCACTTTACCACGTTAATTCTTGATTA<br>GC                     | This study |
| CMW3074                                 | $\Delta$ Ig <sup>222</sup> down R;<br>BYH206 | TGCGCATGCTAGCTATAGTTCTAGAGGTACTCA<br>TTTTCTTCTGAGGTTTC       | This study |
| <b>qPCR</b>                             |                                              |                                                              |            |
| CMW2926                                 | <i>gyrA</i> F                                | TGGCCAGCCAGAGATCAAG                                          | This study |
| CMW2927                                 | <i>gyrA</i> R                                | ACCCGCAGCGGTACGA                                             | This study |
| CMW3206                                 | <i>avcD</i> F                                | TCGACCAGTTAAAGCACCT                                          | This study |
| CMW3207                                 | <i>avcD</i> R                                | CCTTCTGTACGGATCAAGCCA                                        | This study |
| CMW3208                                 | <i>avcI</i> F                                | GTGAATGGATATTTCCGGTGA                                        | This study |
| CMW3209                                 | <i>avcI</i> R                                | TTGTCGCTATTAGAAGCGTT                                         | This study |
| CMW3288                                 | <i>oril</i> F                                | CAGGTGAACCAGCAAATCGA                                         | 71         |
| CMW3289                                 | <i>oril</i> R                                | TGGTATTGAAGCTCAATGCGG                                        | 71         |
| CMW3290                                 | <i>terI</i> F                                | TTCAAGCTGAGGCGGATTTG                                         | 71         |
| CMW3291                                 | <i>terI</i> R                                | GCTCATTGGCTTCTTGCTT                                          | 71         |
| <b>In vitro Transcription Synthesis</b> |                                              |                                                              |            |
| EJW002                                  | <i>avcI</i> RNA F                            | GACCATGATTACGCCATAATACGACTCACT<br>ATAGGGATGATTACAAGCATTTCATG | This study |
| EJW003                                  | <i>avcI</i> RNA R                            | [mU][mU]ACCAATGGATTTTTTGTGC                                  | This study |
| EJW016                                  | <i>avcI</i> -RC RNA F                        | GACCATGATTACGCCATAATACGACTCACT<br>ATAGGGTTACCAATGGATTTTTTG   | This study |

|        |                       |                        |            |
|--------|-----------------------|------------------------|------------|
| EJW017 | <i>avcI</i> -RC RNA R | [mA][mU]GATTACAAGCATTG | This study |
|--------|-----------------------|------------------------|------------|

- 260 <sup>1</sup>F = Forward
- 261 <sup>2</sup>R= Reverse
- 262 <sup>3</sup>RBS= Ribosomal Binding Site
- 263 <sup>4</sup>Up= Amplifies Upstream Fragment
- 264 <sup>5</sup>Down= Amplifies Downstream Fragment
- 265
- 266
- 267
- 268

269 **Supplementary Table 4:** Maximum conservation of homologs from different phylogenetic lineages.

| AvcD homologs summary table                                                               |                           |              |
|-------------------------------------------------------------------------------------------|---------------------------|--------------|
| Lineages and percentage similarities of AvcD homologs containing both DCD and PLN domains |                           |              |
| DomArch.Gene3D                                                                            | Lineage                   | Max%Positive |
| PLN+DCD                                                                                   | Bacteria>Proteobacteria   | 100.00       |
| PLN+DCD                                                                                   | Bacteria>Bacteroidetes    | 58.80        |
| PLN+DCD                                                                                   | Bacteria>Balneolaeota     | 56.02        |
| PLN+DCD                                                                                   | Bacteria>Actinobacteria   | 55.63        |
| PLN+DCD                                                                                   | Archaea>Thaumarchaeota    | 53.65        |
| PLN+DCD                                                                                   | Bacteria>Firmicutes       | 52.27        |
| PLN+DCD                                                                                   | Bacteria>Planctomycetes   | 52.27        |
| PLN+DCD                                                                                   | Bacteria                  | 51.88        |
| NABP+PLN+DCD                                                                              | Bacteria>Proteobacteria   | 51.09        |
| PLN+DCD                                                                                   | Bacteria>Acidobacteria    | 49.70        |
| PLN+DCD                                                                                   | Bacteria>Verrucomicrobia  | 48.69        |
| PLN+DCD                                                                                   | Bacteria>Chlamydiae       | 45.25        |
| PLN+DCD+NABP                                                                              | Bacteria>Proteobacteria   | 42.48        |
| PLN+DCD+NABP+NABP                                                                         | Bacteria>Proteobacteria   | 39.85        |
| PLN+PLN+DCD                                                                               | Bacteria>Proteobacteria   | 36.75        |
| PLN+DCD                                                                                   | Bacteria>Cyanobacteria    | 34.63        |
| PLN+DCD                                                                                   | Eukaryota>Ascomycota      | 27.63        |
| PLN+DCD                                                                                   | Eukaryota>Ciliophora      | 27.57        |
| PLN+DCD                                                                                   | Eukaryota>Basidiomycota   | 25.10        |
| PLN+DCD                                                                                   | Eukaryota>Chytridiomycota | 23.77        |
| PLN+DCD                                                                                   | Eukaryota>Mucoromycota    | 22.63        |
| PLN+DCD                                                                                   | Eukaryota>Apicomplexa     | 19.96        |
| PLN+DCD                                                                                   | Eukaryota>Streptophyta    | 19.39        |
| PLN+Znf_CCHC+DCD                                                                          | Eukaryota>Ascomycota      | 16.92        |

**Key**  
(% pos)



100  
15

**Abbreviations.** PLN, P-loop containing nucleotide triphosphate hydrolases; DCD, Cytidine Deaminase domain 2; NABP, Nucleic acid-binding proteins; Znf\_CCHC, Zinc finger CCHC-type

271  
272

**Supplementary Table 5:** Absolute intracellular concentration of dNTPs from Figure 2E

| Nucleotides | Absolute Intracellular dNTP Concentration in pmol/mg of Total Protein |                     |                       |                        |                       |
|-------------|-----------------------------------------------------------------------|---------------------|-----------------------|------------------------|-----------------------|
|             | pVector                                                               | pAvcD <sup>WT</sup> | pAvcD <sup>S52K</sup> | pAvcD <sup>E384A</sup> | pAvcD <sup>ETEC</sup> |
| dATP        | 37.8 ± 2.6                                                            | 60.9 ± 9.1          | 32.3 ± 1.8            | 35.0 ± 2.9             | 29.5 ± 2.9            |
| dCTP        | 33.2 ± 3.6                                                            | 8.3 ± 1.5           | 28.9 ± 1.6            | 34.7 ± 3.7             | 11.8 ± 0.9            |
| dGTP        | 213.4 ± 22.7                                                          | 229.5 ± 69.6        | 178.5 ± 8.9           | 211.9 ± 18.4           | 163.9 ± 9.7           |
| dTTP        | 57.1 ± 3.7                                                            | 82.47 ± 23.3        | 44.9 ± 1.2            | 53.9 ± 2.1             | 51.9 ± 11.1           |
| dUTP        | 5.4 ± 0.5                                                             | n.d.                | 4.7 ± 0.4             | 5.6 ± 0.5              | n.d.                  |
| dCMP        | 3579.1 ± 1242.7                                                       | 592.8 ± 113.9       | 3429.7 ± 1113.2       | 3513.9 ± 975.2         | 972.6 ± 318.1         |
| dUMP        | 46.6 ± 14.5                                                           | 35.4 ± 1.4          | 45.7 ± 16.5           | 43.5 ± 5.6             | 49.8 ± 16.3           |

273
